# Supplementary material for: Synthesis and DNase I Inhibitory Properties of New Squaramides
Source: MDPI journal article supplement (doi:10.3390/molecules28020538), 2023-01-05
Supplement: s1 [file s1]

**Table S1.** Bond Lengths for compound **3a** and **3c**

| Compound <b>3a</b> |     |          | Compound <b>3c</b> |     |          |
|--------------------|-----|----------|--------------------|-----|----------|
| Bond               |     | Length/Å | bond               |     | Length/Å |
| O2                 | C2  | 1.322(2) | O2                 | C2  | 1.317(3) |
| O2                 | C12 | 1.456(2) | O2                 | C12 | 1.451(3) |
| O3                 | C3  | 1.222(2) | N1                 | C5  | 1.467(3) |
| C7                 | C8  | 1.379(2) | N1                 | C1  | 1.318(3) |
| C7                 | C6  | 1.501(2) | O4                 | C4  | 1.208(3) |
| C7                 | C11 | 1.377(3) | N2                 | C8  | 1.335(3) |
| N1                 | C1  | 1.319(2) | N2                 | C9  | 1.332(3) |
| N1                 | C5  | 1.452(2) | O3                 | C3  | 1.224(3) |
| C1                 | C2  | 1.397(2) | C7                 | C8  | 1.380(3) |
| C1                 | C4  | 1.469(3) | C7                 | C11 | 1.382(3) |
| C2                 | C3  | 1.442(3) | C7                 | C6  | 1.503(3) |
| N2                 | C8  | 1.332(2) | C2                 | C1  | 1.394(3) |
| N2                 | C9  | 1.329(3) | C2                 | C3  | 1.459(3) |
| C3                 | C4  | 1.507(3) | C5                 | C6  | 1.524(3) |
| O4                 | C4  | 1.209(2) | C5                 | C14 | 1.517(3) |
| C5                 | C6  | 1.520(3) | C1                 | C4  | 1.476(3) |
| C11                | C10 | 1.375(3) | C11                | C10 | 1.379(4) |
| C9                 | C10 | 1.366(3) | C4                 | C3  | 1.500(4) |
| C12                | C13 | 1.452(3) | C10                | C9  | 1.360(4) |
|                    |     |          | C12                | C13 | 1.446(4) |

**Table S2.** Bond Angles for compound **3a** and **3c**

| Compound <b>3a</b> |      |      |            | Compound <b>3c</b> |      |      |            |
|--------------------|------|------|------------|--------------------|------|------|------------|
| Atom               | Atom | Atom | Angle/°    | Atom               | Atom | Atom | Angle/°    |
| C2                 | O2   | C12  | 116.13(14) | Atom               | Atom | Atom | Angle/°    |
| C8                 | C7   | C6   | 121.04(16) | C2                 | O2   | C12  | 116.64(19) |
| C11                | C7   | C8   | 116.59(17) | C1                 | N1   | C5   | 123.97(19) |
| C11                | C7   | C6   | 122.34(16) | C9                 | N2   | C8   | 116.6(2)   |
| C1                 | N1   | C5   | 124.41(16) | C8                 | C7   | C11  | 116.8(2)   |
| N1                 | C1   | C2   | 137.29(18) | C8                 | C7   | C6   | 120.6(2)   |
| N1                 | C1   | C4   | 132.46(17) | C11                | C7   | C6   | 122.6(2)   |
| C2                 | C1   | C4   | 90.24(15)  | O2                 | C2   | C1   | 130.0(2)   |
| O2                 | C2   | C1   | 129.66(16) | O2                 | C2   | C3   | 136.4(2)   |
| O2                 | C2   | C3   | 136.19(16) | C1                 | C2   | C3   | 93.54(19)  |
| C1                 | C2   | C3   | 94.11(15)  | N2                 | C8   | C7   | 124.7(2)   |
| C9                 | N2   | C8   | 116.94(17) | N1                 | C5   | C6   | 110.85(19) |
| O3                 | C3   | C2   | 137.57(19) | N1                 | C5   | C14  | 109.55(18) |
| O3                 | C3   | C4   | 135.36(19) | C14                | C5   | C6   | 110.80(19) |
| C2                 | C3   | C4   | 87.06(15)  | N1                 | C1   | C2   | 137.4(2)   |
| N2                 | C8   | C7   | 124.48(18) | N1                 | C1   | C4   | 132.0(2)   |
| N1                 | C5   | C6   | 112.47(16) | C2                 | C1   | C4   | 90.61(18)  |
| C7                 | C6   | C5   | 112.27(15) | C10                | C11  | C7   | 119.2(2)   |

|     |     |     |            |     |     |     |            |
|-----|-----|-----|------------|-----|-----|-----|------------|
| C10 | C11 | C7  | 120.14(18) | O4  | C4  | C1  | 134.3(2)   |
| N2  | C9  | C10 | 123.43(19) | O4  | C4  | C3  | 137.0(2)   |
| C9  | C10 | C11 | 118.38(19) | C1  | C4  | C3  | 88.63(18)  |
| C1  | C4  | C3  | 88.57(15)  | O3  | C3  | C2  | 136.8(3)   |
| O4  | C4  | C1  | 134.92(19) | O3  | C3  | C4  | 136.0(2)   |
| O4  | C4  | C3  | 136.51(19) | C2  | C3  | C4  | 87.21(18)  |
| C13 | C12 | O2  | 108.63(17) | C7  | C6  | C5  | 114.37(18) |
|     |     |     |            | C9  | C10 | C11 | 119.3(2)   |
|     |     |     |            | N2  | C9  | C10 | 123.4(2)   |
|     |     |     |            | C13 | C12 | O2  | 108.9(2)   |

**Table S3.** Hydrogen Bonding and weak interactions for **3a** and **3c**.

| <b>3a</b> |      |                 |          |          |          |         |
|-----------|------|-----------------|----------|----------|----------|---------|
| D         | H    | A               | d(D-H)/Å | d(H-A)/Å | d(D-A)/Å | D-H-A/° |
| N1        | H1   | N2 <sup>1</sup> | 0.86     | 2.05     | 2.908(2) | 172.4   |
| C5        | H5A  | O2              | 0.97     | 2.62     | 3.283(2) | 126.1   |
| C5        | H5B  | O4 <sup>2</sup> | 0.97     | 2.46     | 3.408(2) | 166.5   |
| C6        | H6B  | O3 <sup>3</sup> | 0.97     | 2.46     | 3.385(2) | 159.1   |
| C13       | H13B | O3 <sup>4</sup> | 0.96     | 2.64     | 3.587(3) | 167.4   |

<sup>1</sup>1+X,-1+Y,+Z; <sup>2</sup>3/2-X,-1/2+Y,1/2-Z; <sup>3</sup>1/2-X,-1/2+Y,1/2-Z; <sup>4</sup>X,1-Y,1-Z

| <b>3c</b> |      |                 |          |          |          |         |
|-----------|------|-----------------|----------|----------|----------|---------|
| D         | H    | A               | d(D-H)/Å | d(H-A)/Å | d(D-A)/Å | D-H-A/° |
| C5        | H5   | O2              | 0.98     | 2.59     | 3.279(3) | 127.5   |
| C14       | H14B | O3 <sup>1</sup> | 0.96     | 2.64     | 3.587(3) | 169.8   |
| C13       | H13C | O3 <sup>2</sup> | 0.96     | 2.41     | 3.365(4) | 170.6   |
| N1        | H1   | N2 <sup>3</sup> | 0.95(3)  | 1.98(3)  | 2.927(3) | 177(3)  |

<sup>1</sup>+X,-1+Y,+Z; <sup>2</sup>-X,1-Y,2-Z; <sup>3</sup>-1+X,+Y,+Z
